1 For Method articles

2

3 Title

4 An ImageJ-based tool for three-dimensional registration between different types of  
5 microscopic images

6

7

8 Authors

9 Hiroshi Koyama<sup>1,2,\*</sup>, Kanae Kishi<sup>1,3</sup>, and Toshihiko Fujimori<sup>1,2,3</sup>

10

11 <sup>1</sup>Division of Embryology, National Institute for Basic Biology, 5-1 Higashiyama,  
12 Myodaiji, Okazaki, Aichi 444-8787, Japan

13 <sup>2</sup>SOKENDAI (The Graduate University for Advanced Studies), Hayama, Kanagawa 240-  
14 0193, Japan

15 <sup>3</sup>Japan Science and Technology Agency, Core Research for Evolutional Science and  
16 Technology (JST-CREST), Kawaguchi, Saitama, Japan 3

17

18 \*Correspondence: Hiroshi Koyama

19 Division of Embryology, National Institute for Basic Biology, 5-1

20 Higashiyama, Myodaiji, Okazaki, Aichi 444-8787, Japan

21 Phone: +81 564 59 5862,

22 [hkoyama@nibb.ac.jp](mailto:hkoyama@nibb.ac.jp).

23

24 **Conflicts of interest**

25 The authors declare no competing financial interests.

26

27 **Keywords**

28 Image registration, three-dimensional image rotation, mouse early embryo, ImageJ

29

30

31 Abstract

32 Three-dimensional (3D) registration (i.e. alignment) between two microscopic images is  
33 substantially helpful to study tissues not adhere to substrates such as mouse embryos and  
34 organoids which are often three-dimensionally rotated during imaging. However, there is  
35 no 3D registration tool easily accessible for experimental biologists. Here we developed  
36 an ImageJ-based tool which achieves 3D registration accompanying both quantitative  
37 evaluation of the accuracy and reconstruction of 3D rotated images. In this tool, several  
38 landmarks are manually provided in two images to be aligned, and 3D rotation is  
39 computed so that the distances between the paired landmarks from the two images are  
40 minimized. By simultaneously providing multiple points (e.g. all nuclei in the regions of  
41 interest) other than the landmarks in the two images, the correspondence of each point  
42 between the two images is quantitatively explored: a certain nucleus in one image  
43 corresponds to which nucleus in another image. Furthermore, the 3D rotation is applied  
44 to one of the two images, resulting in reconstruction of 3D rotated images. We  
45 demonstrated that this tool successfully achieved 3D registration and reconstruction of  
46 images in mouse pre-implantation embryos, where one image was obtained during live  
47 imaging and another image from fixed embryos after live imaging. This approach  
48 provides a versatile tool applicable for various tissues and species.

49

50

51

52

53 Introduction

54 Three-dimensional (3D) imaging is a central technique in developmental biology and  
55 organoid studies, which is achieved by confocal microscopies, multiphoton microscopies,  
56 micro-CT (computed tomography), etc. During live imaging of tissues such as early  
57 embryos of mice, chordates, and echinoderms, and organoids, they can be three-  
58 dimensionally rotated in the cultured medium/liquid because they do not adhere to  
59 substrates. In studies relating to cell tracking and cell lineage, researchers have to pay  
60 much efforts to determine the correspondence of each cell between images before and  
61 after the rotation (Koyama et al., 2022; Kurotaki et al., 2007). Similar issues also raise  
62 when researchers compare live imaging data with images obtained from samples fixed  
63 after live imaging (Fig. 1) (Pokrass et al., 2020; Simon et al., 2020); e.g. characteristics  
64 different from those obtained from the live imaging are visualized from fixed samples  
65 that are subjected to immunostaining, while the tissues are rotated during fixation. In  
66 addition, alignment between different embryos at a similar embryonic stage is also helpful  
67 for comparing differences of cell lineage and positions between the different embryos  
68 (Onuma et al., 2020). Under these situations, researchers physically correct the rotations  
69 during sample preparations on microscopic stages or correct on the basis of manual image  
70 processing (Onuma et al., 2020; Pokrass and Regot, 2021; Simon et al., 2020), both of

71 which are usually time-consuming processes. In the former case, an exact correction is  
72 almost impossible (i.e. spatial discrepancies between two images remain to some extent),  
73 which may be problematic for spatially intricate regions in tissues. In the latter case, the  
74 correspondence of each cell between two images is performed without reconstructing  
75 three-dimensionally rotated images, and thus the outcomes of the operations are not  
76 clearly presented. Therefore, it is difficult for other researchers (and even for the  
77 researchers doing the manual operations) to evaluate whether the corrections are reliable.  
78 To improve these situations, it is critical to develop an image processing tool for 3D  
79 registration accompanying both visualization and quantitative evaluation of the outcomes,  
80 which should be easily accessible for experimental biologists who are not so familiar to  
81 image processing.

82 For experimental biologists, the ImageJ software and its high-functionality  
83 version Fiji are the most widely accessible image processing tools. In default plugins  
84 implemented in Fiji, “Correct 3D drift” is a 3D registration tool, but it only considers 3D  
85 translation (i.e. x, y, and z-directional movements) but not rotation. Another 3D  
86 registration plugin called “Descriptor-based registration (2d/3d)” is implemented for  
87 specific situations where many beads are embedded as landmarks in samples and are  
88 computationally detected for subsequent usage of 3D registration (Preibisch et al., 2010).

89 A more primitive way is manual operations of “Rotate” and “Reslice” tools, both of which  
90 are basic functions in ImageJ/Fiji; through multiple cycles of these two tools, any 3D  
91 rotation and subsequent 3D reconstruction can in principle be achieved. However, as far  
92 as we tried, it is very hard to determine correct 3D rotations and angles of reslices,  
93 probably except for researchers who can easily imagine 3D rotation of objects. Image  
94 processing tools other than ImageJ have been developed for experimental biology  
95 especially for segmentation of two-dimensional epithelial cells and subsequent  
96 quantitative analyses (Heller et al., 2016; Tan et al., 2021), and for segmentation of objects  
97 in three-dimensional tissues (Azuma and Onami, 2017; Bao et al., 2006; McDole et al.,  
98 2018).

99 In the present study, we developed a versatile 3D registration/rotation tool which  
100 can be applicable for any types of 3D images and can be run on ImageJ.

101

102

## 103 Materials and Methods

### 104 *Mouse embryos*

105 The mouse embryos at the blastocyst stage were used as the test case. We performed  
106 confocal fluorescent microscopic imaging of fluorescently-labeled nuclei in living

107 embryos in a manner similar to our previous works (Fig. 2, 1<sup>st</sup> image) (Azuma and Onami,  
108 2017; Koyama et al., 2022). Subsequently, we fixed the embryos, stained the nuclei by  
109 Hoechst, and then imaged them (Fig. 2, 2<sup>nd</sup> image). The blastocysts are composed of two  
110 cell types: the trophectoderm (TE) cells form an outermost layer and the inner cell mass  
111 (ICM) cells form an inner cell aggregate with high cell density (Fig. 2, illustration). The  
112 image obtained from the fixed embryos showed rotation compared with the image from  
113 living embryos (Fig. 2; see the location of ICMS).

114         The microscopic imaging conditions are as follows: the confocal microscopy  
115 (A1 laser scanning confocal microscope, Nikon, Japan) with a 60× objective (PlanApo;  
116 WI; NA=1.20, Nikon, Japan), Z-slices separated by 0.575μm for live embryos or  
117 0.625μm for fixed embryos. The nuclei in the live or fixed embryos were labeled by YFP  
118 conjugated with a nuclear localization signal or Hoechst, respectively.

119

### 120 *Overview of methods for 3D-registration*

121 For studies of cell lineage in the mouse early embryos (Kurotaki et al., 2007; Pokrass et  
122 al., 2020; Simon et al., 2020), 3D registration during live imaging or between live and  
123 fixed embryos substantially supports the analyses. We developed a landmark-based 3D  
124 registration and applied to the blastocysts. The overview of our method is illustrated in



125 Fig. 3. In the first step, as landmarks, we manually chose several pairs of the same nuclei  
126 between the 1<sup>st</sup> and 2<sup>nd</sup> images (Fig. 3A, step-1). In addition to the landmarks, we  
127 manually chose all objects (i.e. nuclei) of interest in the both images, which are not paired  
128 at this moment (Fig.3A, step-2). The manual steps needed in our method are limited to  
129 the above two steps, and thus, user's effort is minimum. The next step is the core in our  
130 method, where 3D rotation was computationally performed so that the summation of the  
131 distances between the paired landmarks became minimized (Fig. 3A, step-4). Note that  
132 this summation is called the cost function to be minimized. In the present case, the  
133 landmarks in the 2<sup>nd</sup> image were rotated. In general, 3D rotation is expressed as a matrix  
134 composed of three rotational angles (Fig. 3B), while 2D rotation is of one rotational angle  
135 (Fig. 3B). Therefore, the optimal values of these three angles were computed; the  
136 mathematical algorithm is explained in Appendix.

137 By using the optimal values of the three angles, we performed following two  
138 analyses. 1) The xyz-coordinates of the nuclei of interest chosen in the previous step were  
139 computationally rotated according to the three rotational angles (Fig. 3A, step-5). For  
140 each nucleus in the live embryos, we computationally determined the nearest nucleus in  
141 the fixed embryos. In other words, we determined the correspondences of the several tens  
142 of the nuclei between the live and fixed embryos (Fig. 3A, step-5, "pairs"). 2) We also

143 applied the rotation based on the three rotational angles to the images from the fixed  
144 embryos, and reconstructed 3D images (Fig. 3A, step-6). Consequently, we can easily  
145 compare the resultant 3D images with the images from the live embryos. These two  
146 analyses enabled us to quantitatively and visually determine the correspondences of the  
147 nuclei between the live and fixed embryos.

148 In addition to the above steps, we implemented optional steps to adjust real  
149 situations. In real tissues, fixation often shrink tissues. Moreover, conditions of  
150 microscopic imaging cause shrinkage or elongation of 3D images along the Z-axis; e.g.  
151 differences of refractive indices between glass of the glass-base dishes and medium for  
152 specimen. Severe shrinkage or elongation can spoil the 3D registration. We can revise the  
153 x, y, and z scales in both the live and fixed embryos before or after the choice of the  
154 landmarks (Fig. 3A, “[Optional...” and step-3).

155

156 **Results**

157 *3D rotation of landmarks and objects of interest*

158 We applied our method to the mouse blastocysts. In Fig. 2 (“Z-slice” and “MIP”), we  
159 chose 9 nuclei as landmarks. In addition to the landmarks, we also labeled several tens of  
160 the nuclei as objects of interest. We loaded the xyz-coordinates of the landmarks into our

161 ImageJ-macro, and then, computationally obtained the values of the three angles for 3D  
162 rotation. Note that the rotation centers in the two images were set at the centroids of the  
163 landmarks. Finally, we generated an image where the rotated positions of the landmarks  
164 were depicted as particles. This image is a 3D image (i.e. composed of multiple z-slices)  
165 Fig 4A shows a merged 3D image of the landmarks from the 1<sup>st</sup> and 2<sup>nd</sup> images. Before  
166 the rotation, the landmarks from the two images were not closely located (Fig. 4A, left  
167 panel), whereas, after the rotations, the landmarks became closely located (Fig. 4A, right  
168 panel).

169 Then, we applied the 3D rotation to the positions of the nuclei other than the  
170 landmarks, and generated a 3D image (i.e. composed of multiple z-slices). In the 3D  
171 image where the nuclei from the 1<sup>st</sup> and the rotated 2<sup>nd</sup> images were merged (Fig. 4B, left  
172 panel), most of the nuclei from the two images were closely located and paired each other  
173 (e.g. labeled by yellow). We can also find several nuclei which did not have counterparts  
174 (e.g. labeled by light blue with dashed line), this is because we failed to label all the nuclei  
175 at the step-2 in Fig. 3. In other words, the 3D visualization helped us to judge whether we  
176 successfully label all nuclei of interest. In addition, we can also check the localization of  
177 the positions of the rotated nuclei in each Z-slice (Fig. 4B, right panel).

178 To determine the correspondence of each nucleus between the 1<sup>st</sup> and the rotated

179 2<sup>nd</sup> images, we calculated the distances between the nuclei in the two images. For each  
180 nucleus in the 1<sup>st</sup> image, we searched for the nearest nucleus in the rotated 2<sup>nd</sup> image. Fig.  
181 4C show the ID of the nearest nucleus and the distance between the paired nuclei. We  
182 also searched for the 2<sup>nd</sup> and 3<sup>rd</sup> nearest nuclei as shown in Fig. 4C. By quantitatively  
183 evaluating the distances of these three candidates, we can judge which nucleus is the  
184 counterpart of each nucleus from the 1<sup>st</sup> image. Simultaneously, under an assumption that  
185 the nearest nucleus is the correct counterparts, we generated a 3D image where the paired  
186 nuclei were presented by the same color (Fig. 4D).

187

### 188 *3D reconstruction of rotated image*

189 We developed an algorithm to reconstruct rotated 2<sup>nd</sup> images. We applied the above 3D  
190 rotation to the 2<sup>nd</sup> image itself (i.e. pixel/voxel-based rotation is applied). In Fig. 5A, the  
191 rotated 2<sup>nd</sup> image is shown (blastocyst #1 vs. Fig. 2 which are the images before the  
192 rotation). A merged image of the 1<sup>st</sup> and the rotated 2<sup>nd</sup> images exhibited good  
193 correspondences of the nuclei. Moreover, the correspondences are also confirmed by  
194 visualizing Z-slice images in Fig. 5B (e.g. labeled by yellow). The slight spatial  
195 discrepancies between some pairs of the nuclei may result from shrinkage of the  
196 blastocyst by the fixation. Chromosome segregation was observed in the 2<sup>nd</sup> image (Fig.

197 5B, at the upper right of Z-slice #2, which was stained by Hoechst), whereas the signal in  
198 the 1<sup>st</sup> image was obscure; this is because the nuclear localization signal which does not  
199 bind to the chromosomes was used in the 1<sup>st</sup> image. Another example of the blastocyst is  
200 shown in Fig. 5A (blastocyst #2). Although the directions between the 1<sup>st</sup> and the 2<sup>nd</sup>  
201 image before the rotation were quite different (1<sup>st</sup> image vs. before rotation), the directions  
202 became absolutely aligned after the rotation (1<sup>st</sup> image vs. rotated 2<sup>nd</sup> image), and the  
203 merged image showed clear correspondences between the paired nuclei.

204 As an additional function in our tool, we can generate merged images between  
205 the nuclear images and the particle images (Fig. 5C), which is useful to identify the IDs  
206 of the nuclei in the nuclear images.

207

### 208 *Performance and accuracy of our algorithm*

209 We evaluated the performance of our algorithm. In our method, we searched for the  
210 optimal values of the three rotation angles as described previously. This kind of problem  
211 is called a minimization problem. In general, a minimization problem has a risk that the  
212 outcome is trapped at local minima of the cost function to be minimized but not the global  
213 minimum which provides the optimal values. In our case, the cost function is the  
214 summation of distances between the paired landmarks as defined in Materials & Methods.

215 To reduce the risk, we performed multiple sets of minimizations in parallel from different  
216 initial values of the three rotation angles. For each angle, we set three initial values,  
217 resulting in 27 ( $3 \times 3 \times 3$ ) sets of minimization processes running (Fig. 6A, vertical axis,  
218 “27 trials”). Some sets may reach at the global minimum, while other sets may be trapped  
219 at local minima. In Fig. 6A, we calculated the probability of reaching the global minimum  
220 (i.e. the numbers of the trials reaching the global minimum among the 27 trials). In the  
221 case of landmarks = 9, three blastocysts showed high probabilities (#2,3,4), whereas one  
222 blastocyst showed low probability (#1). Among the 9 landmarks, we randomly selected  
223 3, 5, or 7 landmarks, and performed the minimizations. For each blastocyst, the number  
224 of the landmarks did not significantly affect the probability. These results suggest that the  
225 probability is largely dependent on individual blastocysts but not the numbers of  
226 landmarks.

227         Next, we evaluated the accuracy of pairing the nuclei other than the landmarks.  
228 We manually defined the correct pairs of the nuclei, and examined whether the outcomes  
229 of the minimization are consistent with the correct pairs. Note that we only considered  
230 the outcomes of the global minimum. Fig. 6B shows the percentage of the correct pairs  
231 of the nuclei. In the case of landmarks = 9, all pairs obtained by the minimization were  
232 correct (i.e. accuracy = 100%). On the other hand, under smaller numbers of landmarks

233 (3 and 5), the accuracy became reduced. Together with Fig. 6A, we think that the numbers  
234 of landmarks should be  $\geq 7$ , and that 27 sets of initial values of the three rotation angles  
235 are sufficient for most of samples.

236

## 237 Discussion

238 In the present study, we developed a landmark-based 3D registration tool with subsequent  
239 3D image reconstruction, and demonstrated that this tool worked well for the mouse  
240 blastocysts composed of several tens of nuclei. This tool contains several ways of  
241 visualizing and quantifying the registration outcomes, which enables us to objectively  
242 judge which nucleus in one image corresponds to a nucleus in another image. Importantly,  
243 for versatility in the field of experimental biology, this tool can run as ImageJ's macros.

244

### 245 *Applicability to objects other than nucleus*

246 We chose nuclei as landmarks, but any objects are permitted. A sole requirement of our  
247 tool is that users can identify the same position between the 1<sup>st</sup> and 2<sup>nd</sup> images. Therefore,  
248 even in the case that different markers are used between the two images, we can perform  
249 3D registration if landmarks are correctly defined. Similarly, objects of interest (Fig. 3,  
250 step-2) are not limited to nuclei. In addition, even if we do not choose any objects of

251 interest, we can carry out 3D image reconstruction using landmarks. These flexibilities of  
252 our tool expand the range of the applicability.

253

#### 254 *Comparison with other possible methods*

255 Here we discuss the comparison of our method with other 3D registration methods.

256 Except for the methods described in the Introduction section, other possible method is as

257 follows. The most straightforward strategy of 3D registration is based on pixel-by-pixel

258 correlation of intensities between two images. By translating and rotating one of the two

259 images, we can search for the image transformation which gives the highest correlation.

260 In order that this method works well, there would be some requirements. For instance,

261 decay of intensities along Z-depth should be slight, because the decay significantly affects

262 the value of the correlation. However, in real images of biological specimen, intensities

263 are usually decayed along the Z-depth. Another requirement is related to image qualities,

264 but we cannot expect comparable qualities between images from live specimen and from

265 fixed specimen. A more critical point is its limited applicability to the cases that two

266 specimens are stained by different markers showing different localizations: nucleus vs

267 cytoplasm, something fluorescently labeled vs micro-CT, etc. In these cases, the

268 correlation of intensities between the two images is meaningless. From the viewpoint of



269 computational load, the search for the highest correlation in 3D translation and rotation  
270 may result in unrealistic running time. By contrast, our method is based on the manual  
271 choice of landmarks. Although this strategy is primitive, we can potentially label correct  
272 landmarks under the above situations by considering information of tissue geometries,  
273 etc. Therefore, we think that the manual choice of landmarks expands the applicability of  
274 our method.

275

#### 276 *Expertise required to implement the method*

277 Our method was developed as ImageJ/Fiji's macros (Note that we recommend Fiji but  
278 not ImageJ.). For computers where Fiji is installed, the macros can run immediately after  
279 downloading them (i.e. no additional setting). Usual laptops are sufficient to run the  
280 macros (e.g. MacBook Air). We provide the protocols with the macros as supplementary  
281 materials.

282

283

#### 284 **Appendix**

##### 285 *Definition of 3D rotation*

286 In the case of 2-dimensional situations, the rotation is defined as the following matrix;

287  $\begin{pmatrix} x_i' \\ y_i' \end{pmatrix} = \begin{pmatrix} \cos \theta & -\sin \theta \\ \sin \theta & \cos \theta \end{pmatrix} \begin{pmatrix} x_i \\ y_i \end{pmatrix}$ , where  $\theta$  is the rotation angle,  $x$  and  $y$  are the original

288 coordinates,  $x'$  and  $y'$  are the coordinates after rotation, and  $i$  is the position of  $i$ th object  
 289 such as nuclei and pixels. In the case of 3-dimensional situations, the rotation matrix is  
 290 defined as follows;

$$291 \begin{pmatrix} x_i' \\ y_i' \\ z_i' \\ 1 \end{pmatrix} = \begin{pmatrix} \cos \phi \cos \theta & \cos \phi \sin \theta \sin \psi - \sin \phi \cos \psi & \cos \phi \sin \theta \cos \psi + \sin \phi \sin \psi & 0 \\ \sin \phi \cos \theta & \sin \phi \sin \theta \sin \psi + \cos \phi \cos \psi & \sin \phi \sin \theta \cos \psi - \cos \phi \sin \psi & 0 \\ -\sin \theta & \cos \theta \sin \psi & \cos \theta \cos \psi & 0 \\ 0 & 0 & 0 & 1 \end{pmatrix} \begin{pmatrix} x_i \\ y_i \\ z_i \\ 1 \end{pmatrix}$$

292 , where  $\phi$ ,  $\theta$ , and  $\psi$  are the angles expressing the three-dimensional rotations.

293

294 *Cost function to be minimized*

295 To fit the xyz-coordinates of landmarks from a 2<sup>nd</sup> image to those from a 1<sup>st</sup> image by 3D

296 rotation, we considered the summation of the distances between paired landmarks from

297 the two images as follows;  $G = \sum_{i=1}^I \left\{ (x_i' - X_i)^2 + (y_i' - Y_i)^2 + (z_i' - Z_i)^2 \right\}$ , where  $G$  is the

298 summation,  $I$  is the total number of the landmarks, and  $X$ ,  $Y$ , and  $Z$  are the xyz-coordinates

299 of the landmarks from the 1<sup>st</sup> image. We searched for the values of  $\phi$ ,  $\theta$ , and  $\psi$  which

300 minimized the value of  $G$ , and thus,  $G$  is the cost function to be minimized.

301

302 *Minimization procedure*

303 The minimization of  $G$  was achieved using a Monte Carlo algorithm. Initially,  $\phi$ ,  $\theta$ , and

304  $\psi$  were set to be certain values: in the case of Fig. 6 where 27 sets of initial values were

305 provided, the values of each angle were 0,  $(2/3)\pi$ , or  $(4/3)\pi$ . These values were iteratively

306 modified so that the value of  $G$  became smaller, and consequently,  $G$  is expected to be  
307 minimized (i.e. reaches the global minimum) unless the process is trapped at local minima.  
308 The minimization procedure was implemented as a macro of ImageJ  
309 (Macro\_3D\_particle\_registration\_06\_v2.ijm).

310

### 311 *3D depiction of landmarks and objects of interest*

312 According to the xyz-coordinated of landmarks and objects of interest, they were depicted  
313 as particles in 3D image (i.e. multiple Z-slices) (Fig. 4). This was implemented as a macro  
314 of ImageJ (Macro\_particle\_drawing\_02.ijm). The radius of the particles can be set by  
315 users.

316

### 317 *3D image reconstruction*

318 When we reconstructed 3D rotated image, we applied the values of the three angles to the  
319 xyz-coordinates of each pixel/voxel. The intensities of the rotated voxels are averaged by  
320 a mean filter of  $3 \times 3 \times 3$  kernel. This was implemented as a macro of ImageJ  
321 (Macro\_3D\_image\_rotation\_02.ijm).

322

323 References

- 324 Azuma, Y., and Onami, S. (2017). Biologically constrained optimization based cell  
325 membrane segmentation in *C. elegans* embryos. *BMC Bioinformatics* *18*, 307.
- 326 Bao, Z., Murray, J.I., Boyle, T., Ooi, S.L., Sandel, M.J., and Waterston, R.H. (2006).  
327 Automated cell lineage tracing in *Caenorhabditis elegans*. *Proc. Natl. Acad. Sci. U. S.*  
328 *A.* *103*, 2707–2712.
- 329 Heller, D., Hoppe, A., Restrepo, S., Tapon, N., Basler, K., Mao, Y., Heller, D., Hoppe,  
330 A., Restrepo, S., Gatti, L., et al. (2016). EpiTools : An Open-Source Image Analysis  
331 Toolkit for Quantifying Epithelial Growth Dynamics Technology EpiTools : An Open-  
332 Source Image Analysis Toolkit for Quantifying Epithelial Growth Dynamics. *Dev. Cell*  
333 *36*, 103–116.
- 334 Koyama, H., Okumura, H., Ito, A.M., Otani, T., Nakamura, K., Kato, K., and Fujimori,  
335 T. (2022). Effective mechanical potential of cell–cell interaction explains basic  
336 structures of three-dimensional morphogenesis. *BioRxiv* doi:  
337 <https://doi.org/10.1101/812198>.
- 338 Kurotaki, Y., Hatta, K., Nakao, K., Nabeshima, Y.-I., and Fujimori, T. (2007).  
339 Blastocyst axis is specified independently of early cell lineage but aligns with the ZP  
340 shape. *Science* *316*, 719–723.
- 341 McDole, K., Guignard, L., Amat, F., Berger, A., Malandain, G., Royer, L.A., Turaga,

- 342 S.C., Branson, K., and Keller, P.J. (2018). In Toto Imaging and Reconstruction of Post-  
343 Implantation Mouse Development at the Single-Cell Level. *Cell* 175, 859-876.e33.
- 344 Onuma, T.A., Hayashi, M., Gyoja, F., Kishi, K., Wang, K., and Nishida, H. (2020). A  
345 chordate species lacking Nodal utilizes calcium oscillation and Bmp for left–right  
346 patterning. *Proc. Natl. Acad. Sci. U. S. A.* 117, 4188–4198.
- 347 Pokrass, M.J., and Regot, S. (2021). 3D time-lapse microscopy paired with endpoint  
348 lineage analysis in mouse blastocysts. *STAR Protoc.* 2, 100446.
- 349 Pokrass, M.J., Ryan, K.A., Xin, T., Pielstick, B., Timp, W., Greco, V., and Regot, S.  
350 (2020). Cell-Cycle-Dependent ERK Signaling Dynamics Direct Fate Specification in  
351 the Mammalian Preimplantation Embryo. *Dev. Cell* 55, 328-340.e5.
- 352 Preibisch, S., Saalfeld, S., Schindelin, J., and Tomancak, P. (2010). Software for bead-  
353 based registration of selective plane illumination microscopy data. *Nat. Methods* 7,  
354 418–419.
- 355 Simon, C.S., Rahman, S., Raina, D., Schröter, C., and Hadjantonakis, A.K. (2020). Live  
356 Visualization of ERK Activity in the Mouse Blastocyst Reveals Lineage-Specific  
357 Signaling Dynamics. *Dev. Cell* 55, 341-353.e5.
- 358 Tan, S.E., Tan, W., Fisher, K.H., and Strutt, D. (2021). QuantifyPolarity, a new tool-kit  
359 for measuring planar polarized protein distributions and cell properties in developing

360 tissues. Dev. *148*, dev198952. doi:10.1242/dev.198952.

361

362

363 Figure legends

364 Figure 1: Illustration of rotation and distortion of specimen during preparation

365 A. A tissue is illustrated with inner objects. In this case, the tissue and the inner objects

366 are depicted as spheres.

367 B. An example of image acquisition of the tissue is shown. The acquired image can be

368 shrunk or elongated along Z-axis.

369 C. A rotated tissue is shown. During experimental procedures including fixation, the

370 tissue may be rotated (“a tissue axis” between B and C).

371

372 Figure 2: Rotated image of mouse blastocyst

373 The 1<sup>st</sup> and 2<sup>nd</sup> images are acquired from a live or fixed embryo. A Z-slice, maximum

374 intensity projection (MIP), and 3D view of the images are shown. The regions of the inner

375 cell mass are illustrated for each image. Landmarks and objects of interest were labeled

376 by using ImageJ>Multi-point tool.

377

378 Figure 3: Procedures of 3D registration and reconstruction

379 A. The procedures of our method are illustrated. At step-0, microscopic images are shown  
380 where the 2<sup>nd</sup> image is rotated compared with the 1<sup>st</sup> image. At the “Optional” step, the  
381 shrinkage or elongation of the two images is corrected (arrows). At the step-1, 4  
382 landmarks are exemplified (#1-4). At the step-2, objects of interest are labeled by non-  
383 overlapped numbers between the two images (#5-8 vs #9-12). At the step-3, shrinkage or  
384 elongation of the xyz-coordinates of the landmarks and the objects of interest are  
385 corrected. If shrinkage or elongation of the images has been already corrected at the  
386 “Optional” step, the step-3 is not required. At the step-4, the landmarks in the 2<sup>nd</sup> image  
387 are optimally rotated. At the step-5, the paired objects are identified (e.g. 5-12, 6-11). At  
388 the step-6, the 2<sup>nd</sup> image is rotated to be aligned with the 1<sup>st</sup> image, and the rotated image  
389 is reconstructed.

390 B. Definition of 3D rotation is explained. In the case of 2D rotation, the rotation matrix  
391 contains one angle ( $\theta$  in Appendix 1). In the case of 3D rotation, the rotation matrix  
392 contains three angles ( $\phi$ ,  $\theta$ , and  $\psi$  in Appendix 1).

393

394 Figure 4: Registration of landmarks and objects of interest

395 A. Landmarks in the 1<sup>st</sup> and 2<sup>nd</sup> images are depicted as particles in 3D images. Images

396 before and after the rotation of the 2<sup>nd</sup> image are shown. The 3D images were generated  
397 by using Fiji>Plugins>3D Viewer; all 3D images in this article were generated by the 3D  
398 Viewer.

399 B. Objects of interest in the 1<sup>st</sup> and 2<sup>nd</sup> images are depicted as particles in 3D images. The  
400 landmarks are also depicted. Yellow circles, some examples of paired objects; light blue  
401 circles with dashed lines, a few examples of unsuccessfully paired objects.

402 C. Quantitative evaluation of pairing. For each object of interest in the 1<sup>st</sup> image, three  
403 objects as a candidate for pairing are shown in the 2<sup>nd</sup> image according to distances  
404 between the objects. Four objects in the 1<sup>st</sup> image are exemplified. In the case that an  
405 object in the 2<sup>nd</sup> image is multiply assigned as the nearest neighbor for different objects  
406 in the 1<sup>st</sup> image, such multiply-assigned objects are also listed in the output text file (not  
407 shown in this figure).

408 D. Paired objects between the 1<sup>st</sup> and 2<sup>nd</sup> image are depicted as particles in the same color.  
409 Arrows, three examples of paired objects. Landmarks are also depicted. The original  
410 images were 8-bit images where the intensities of each particle correspond to the IDs of  
411 the objects, and the color was provided by setting lookup tables (ImageJ>Image>Lookup  
412 Tables>3-3-2-RGB).

413



414 Figure 5: 3D reconstruction of rotated image

415 A. 3D images of the 1<sup>st</sup> and the rotated 2<sup>nd</sup> image are shown for two blastocysts (#1 and  
416 #2). The 2<sup>nd</sup> images before rotation are shown in Fig. 2 for #1 or in the bottom panel for  
417 #2. Note that before the rotation, the intensities of the 2<sup>nd</sup> images were normalized along  
418 the Z-axis (ImageJ>Process>Enhance Contrast...>Normalize), and thus, the intensities  
419 were not conserved.

420 B. Two z-slices of the merged image of the blastocyst #1 are exemplified. Yellow,  
421 examples of paired nuclei between the 1<sup>st</sup> and the rotated 2<sup>nd</sup> images.

422 C. A merged image is exemplified where images of nuclei can be the 1<sup>st</sup> or the rotated 2<sup>nd</sup>  
423 images, and particles images constructed in Fig. 4 can be the 1<sup>st</sup> or the rotated 2<sup>nd</sup> images.

424 In other words, 4 ( $2 \times 2$ ) combinations of merged images can be generated. The merged  
425 image was generated by ImageJ>Image>Color>Merge Channels...

426

427 Figure 6: Performance and accuracy of 3D registration

428 A. The performance of the minimization process was evaluated. The probability of  
429 successful minimization among 27 trials is shown for each blastocyst (#1-#4); the  
430 probability = 1.0 means that all 27 trials successfully reached the global minimum. For  
431 the numbers of landmarks = 9,  $N = 1$ . For the numbers = 3, 5, or 7, landmarks were

432 randomly chosen from the 9 landmarks, and 4 sets of different landmarks were generated;

433  $N = 4$ .

434 B. Accuracy of pairing of objects was evaluated for the outcomes of the successful

435 minimization in A. Similar to A, the 4 blastocysts were tested with different number of

436 landmarks for each blastocyst.

437

438

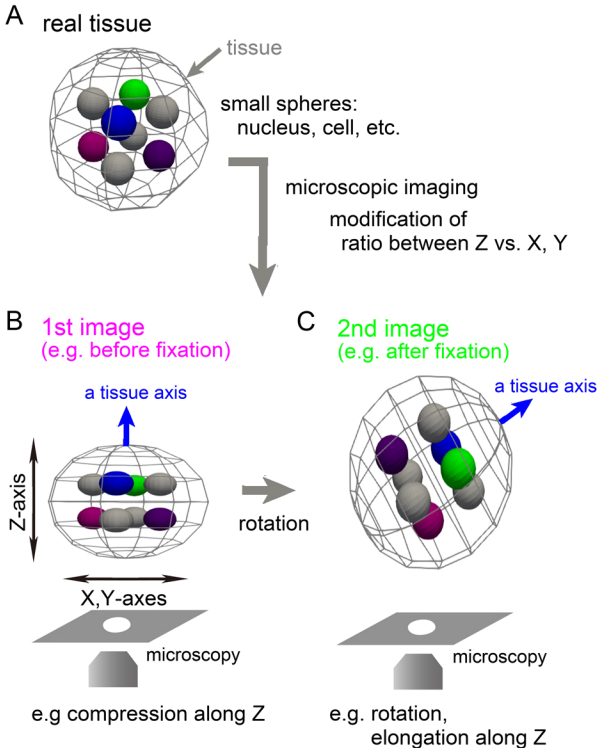

Fig.1 Koyama et al.

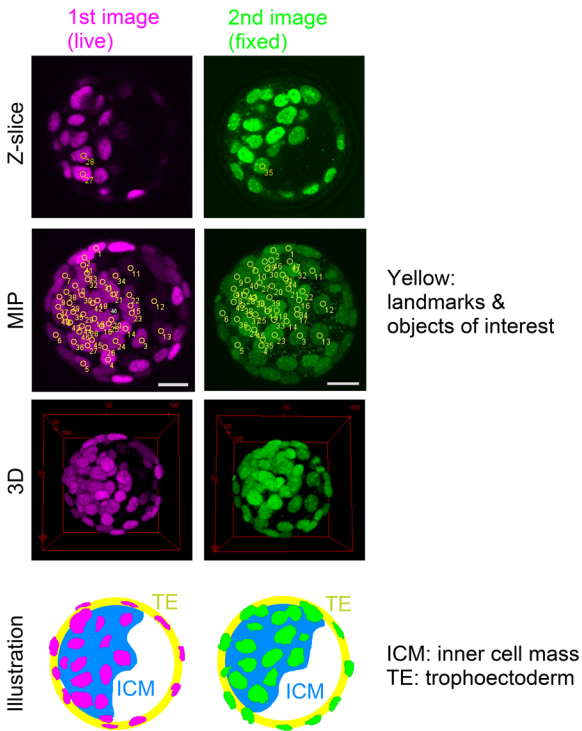

Fig.2 Koyama et al.

# A Overview of procedures

1st image (e.g. before fixation)      2nd image (e.g. after fixation)

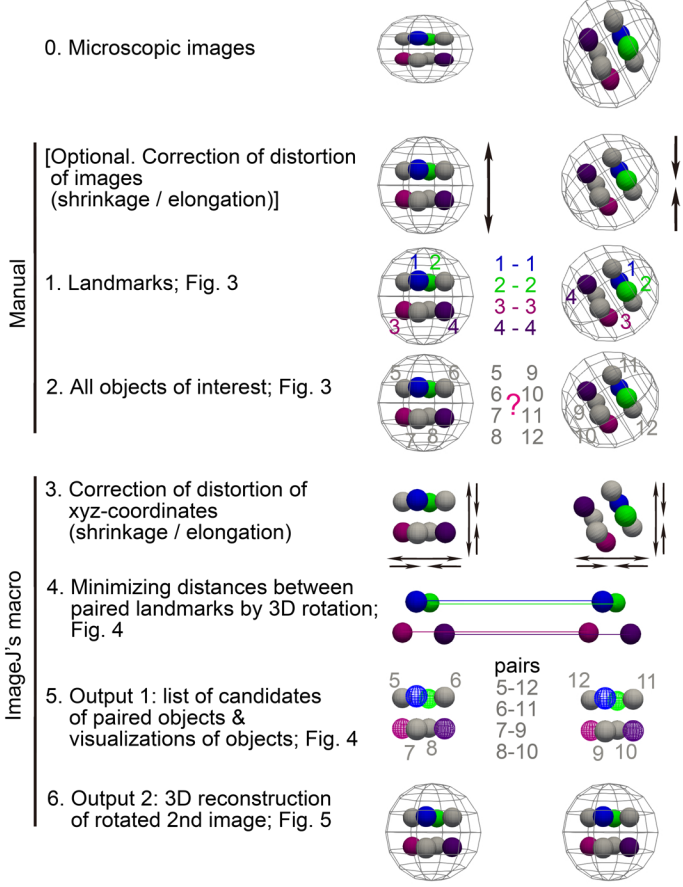

# B Rotation

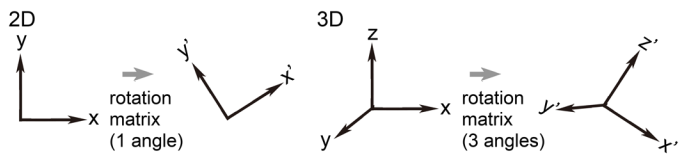

Fig.3 Koyama et al.

# A Landmarks depicted as particles

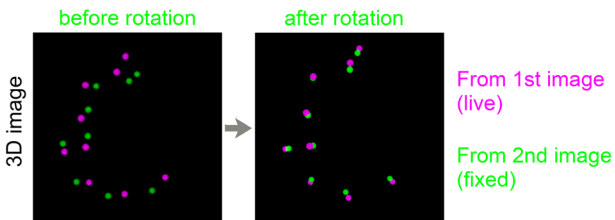

# B Objects of interest + Landmarks

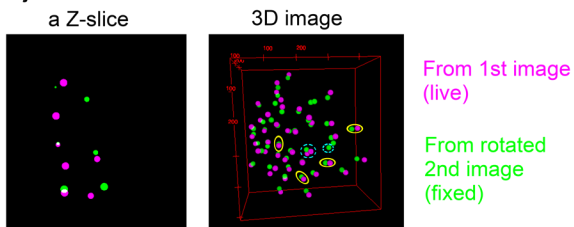

# C List of candidates

|   | A   | B   | C   | D   | E      | F      | G      |
|---|-----|-----|-----|-----|--------|--------|--------|
| 2 | id0 | id1 | id2 | id3 | dist1  | dist2  | dist3  |
| 3 | 10  | 47  | 67  | 66  | 4.8819 | 12.137 | 15.045 |
| 4 | 11  | 48  | 69  | 59  | 4.5223 | 16.844 | 23.892 |
| 5 | 12  | 49  | 59  | 50  | 5.126  | 24.744 | 25.328 |
| 6 | 13  | 50  | 49  | 54  | 5.9789 | 28.165 | 30.94  |

distances of three candidates from the paired object in 1st image

ID of nearest neighbor  
 ID of 2nd nearest neighbor  
 ID of 3rd nearest neighbor  
 ID from 1st image

# D Objects of interest + Landmarks

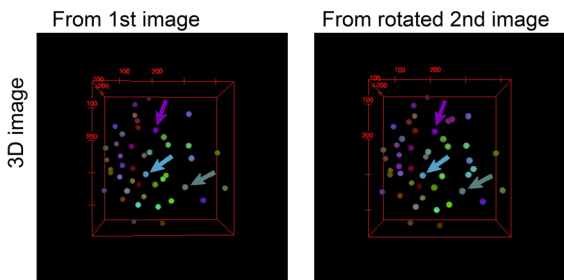

same color = paired objects

Fig.4 Koyama et al.

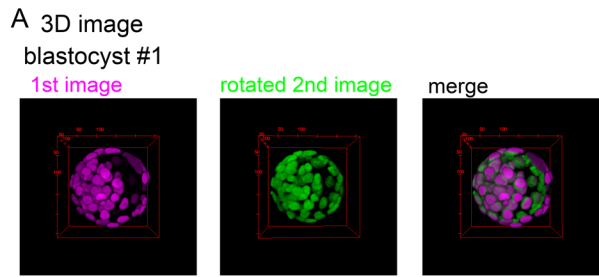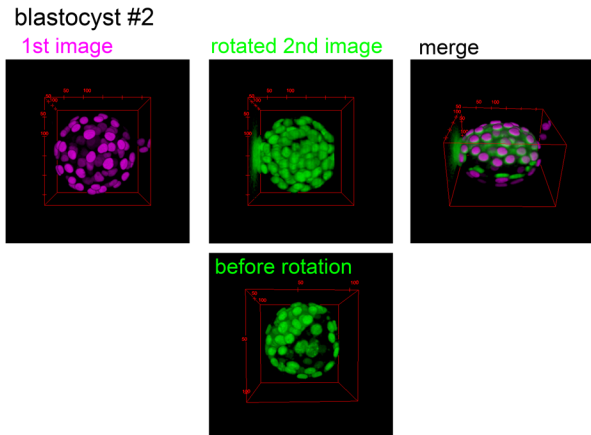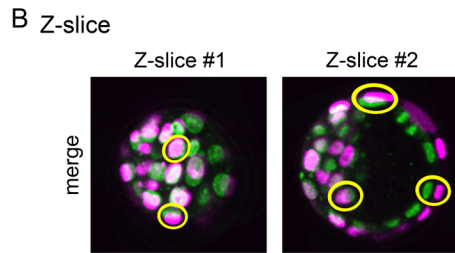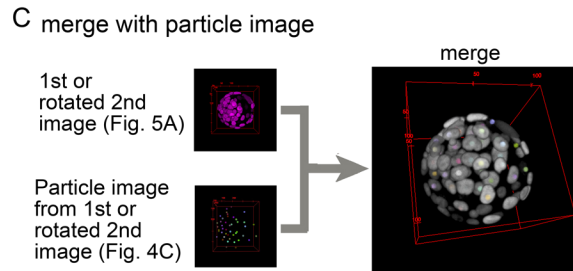

Fig.5 Koyama et al.

# A Probability of successful minimization

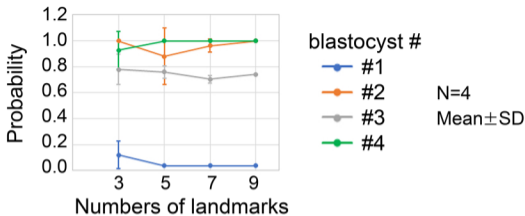

# B Accuracy of pairing

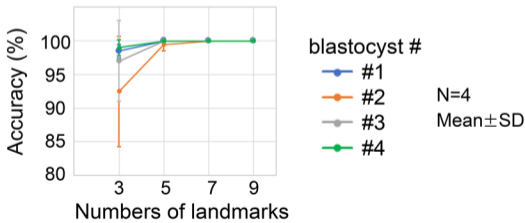

Fig.6 Koyama et al.
